# Supplementary material
Source: publisher figshare collection journal article supplement (https://karger.figshare.com/articles/dataset/_/5951836)
Supplement: Supplementary file 2 [file 486858_sm2.docx]

| **Phyla in stool** | Control (= wild-type) | | Kindlin 2(-/-) | | Kindlin 2(-/-) + UDCA-LPE | |
| --- | --- | --- | --- | --- | --- | --- |
| mean value | deviation | mean value | deviation | mean value | deviation |
| Actinobacteria | 2,10% | 0,37% | 0,63% | 0,56% | 1,23% | 1,05% |
| Bacteroidetes | 84,20% | 5,39% | 38,60%(* +) | 22,50% | 76,33% | 4,03% |
| Candidate division TM7 | 0,10% | 0,08% | 0,00% | 0,00% | 0,07% | 0,09% |
| Cyanobacteria | 0,00% | 0,00% | 0,00% | 0,00% | 0,00% | 0,00% |
| Deferribacteres | 0,00% | 0,00% | 0,00% | 0,00% | 0,03% | 0,05% |
| Firmicutes | 12,03% | 5,17% | 14,33% | 17,36% | 12,10% | 4,58% |
| Proteobacteria | 0,93% | 0,29% | 16,83% | 19,65% | 4,13% | 5,42% |
| Tenericutes | 0,00% | 0,00% | 0,00% | 0,00% | 0,00% | 0,00% |
| Verrucomicrobia | 0,60% | 0,65% | 29,60% | 41,79% | 6,03% | 7,19% |

**Supplemental Table 1:
Diversity of mouse gut microbiota depending on treatment without and with UDCA-LPE applied by oral gavage in Tween 80 (* p < 0.05 vs. control / + p < 0.05 vs. kindlin 2(-/-) + UDCA-LPE)**

| **Classes in stool** | Control (= wild-type) | | Kindlin 2(-/-) | | Kindlin 2(-/-) + UDCA-LPE | |
| --- | --- | --- | --- | --- | --- | --- |
| mean value | deviation | mean value | deviation | mean value | Deviation |
| Actinobacteria | 0,00% | 0,00% | 0,00% | 0,00% | 0,07% | 0,09% |
| Coriobacteriia | 2,10% | 0,37% | 0,60% | 0,57% | 1,17% | 0,96% |
| Bacteroidia | 84,20% | 5,39% | 38,57%(* +) | 22,47% | 76,33% | 4,03% |
| VC2.1 Bac22 | 0,00% | 0,00% | 0,03% | 0,05% | 0,00% | 0,00% |
| Unknown Class | 0,10% | 0,08% | 0,00% | 0,00% | 0,07% | 0,09% |
| uncultured bacterium | 0,00% | 0,00% | 0,00% | 0,00% | 0,00% | 0,00% |
| Melainabacteria | 0,00% | 0,00% | 0,00% | 0,00% | 0,00% | 0,00% |
| Deferribacteres | 0,00% | 0,00% | 0,00% | 0,00% | 0,03% | 0,05% |
| Bacilli | 1,47% | 0,65% | 0,17% | 0,12% | 2,20% | 1,93% |
| Clostridia | 10,23% | 5,37% | 14,07% | 17,18% | 9,50% | 2,65% |
| Erysipelotrichia | 0,37% | 0,12% | 0,17% | 0,09% | 0,40% | 0,42% |
| Alphaproteobacteria | 0,07% | 0,05% | 0,03% | 0,05% | 0,00% | 0,00% |
| Betaproteobacteria | 0,03% | 0,05% | 0,00% | 0,00% | 0,07% | 0,05% |
| Deltaproteobacteria | 0,87% | 0,33% | 0,83% | 0,91% | 0,23% | 0,12% |
| Gammaproteobacteria | 0,00% | 0,00% | 15,97% | 19,95% | 3,80% | 5,30% |
| Mollicutes | 0,00% | 0,00% | 0,00% | 0,00% | 0,00% | 0,00% |
| Verrucomicrobiae | 0,60% | 0,65% | 29,60% | 41,79% | 6,03% | 7,19% |

| **Orders in stool** | Control (= wild-type) | | Kindlin 2(-/-) | | Kindlin 2(-/-) + UDCA-LPE | |
| --- | --- | --- | --- | --- | --- | --- |
| mean value | deviation | mean value | deviation | mean value | deviation |
| Bifidobacteriales | 0,00% | 0,00% | 0,00% | 0,00% | 0,03% | 0,05% |
| Corynebacteriales | 0,00% | 0,00% | 0,00% | 0,00% | 0,00% | 0,00% |
| Coriobacteriales | 2,10% | 0,37% | 0,60% | 0,57% | 1,17% | 0,96% |
| Bacteroidales | 84,20% | 5,39% | 38,57%(* +) | 22,47% | 76,33% | 4,03% |
| uncultured bacterium | 0,00% | 0,00% | 0,03% | 0,05% | 0,00% | 0,00% |
| Unknown Order | 0,10% | 0,08% | 0,00% | 0,00% | 0,07% | 0,09% |
| uncultured bacterium | 0,00% | 0,00% | 0,00% | 0,00% | 0,00% | 0,00% |
| Gastranaerophilales | 0,00% | 0,00% | 0,00% | 0,00% | 0,00% | 0,00% |
| Deferribacterales | 0,00% | 0,00% | 0,00% | 0,00% | 0,03% | 0,05% |
| Bacillales | 0,00% | 0,00% | 0,00% | 0,00% | 0,00% | 0,00% |
| Lactobacillales | 1,47% | 0,65% | 0,17% | 0,12% | 2,20% | 1,93% |
| Clostridiales | 10,23% | 5,37% | 14,07% | 17,18% | 9,50% | 2,65% |
| Erysipelotrichales | 0,37% | 0,12% | 0,17% | 0,09% | 0,40% | 0,42% |
| Rhizobiales | 0,03% | 0,05% | 0,03% | 0,05% | 0,00% | 0,00% |
| Rhodospirillales | 0,00% | 0,00% | 0,00% | 0,00% | 0,00% | 0,00% |
| Burkholderiales | 0,03% | 0,05% | 0,00% | 0,00% | 0,07% | 0,05% |
| Desulfovibrionales | 0,87% | 0,33% | 0,83% | 0,91% | 0,23% | 0,12% |
| B38 | 0,00% | 0,00% | 0,03% | 0,05% | 0,03% | 0,05% |
| Enterobacteriales | 0,00% | 0,00% | 15,90% | 19,93% | 3,77% | 5,26% |
| Pseudomonadales | 0,00% | 0,00% | 0,00% | 0,00% | 0,00% | 0,00% |
| RF9 | 0,00% | 0,00% | 0,00% | 0,00% | 0,00% | 0,00% |
| Verrucomicrobiales | 0,60% | 0,65% | 29,60% | 41,79% | 6,03% | 7,19% |

| **Families in stool** | Control (= wild-type) | | Kindlin 2(-/-) | | Kindlin 2(-/-) + UDCA-LPE | |
| --- | --- | --- | --- | --- | --- | --- |
| mean value | deviation | mean value | deviation | mean value | deviation |
| Bifidobacteriaceae | 0,00% | 0,00% | 0,00% | 0,00% | 0,03% | 0,05% |
| Nocardiaceae | 0,00% | 0,00% | 0,00% | 0,00% | 0,00% | 0,00% |
| Coriobacteriaceae | 2,10% | 0,37% | 0,60% | 0,57% | 1,17% | 0,96% |
| Bacteroidaceae | 0,10% | 0,08% | 0,70% | 0,85% | 0,77% | 0,74% |
| Porphyromonadaceae | 0,07% | 0,05% | 3,70% | 4,81% | 2,23% | 2,74% |
| Prevotellaceae | 2,57% | 1,44% | 2,67% | 2,01% | 10,60% | 7,32% |
| Rikenellaceae | 0,77% | 0,39% | 1,63% | 1,44% | 1,70% | 0,37% |
| S24-7 | 80,77% | 4,64% | 29,90%(* +) | 18,78% | 61,07% | 14,96% |
| uncultured bacterium | 0,00% | 0,00% | 0,03% | 0,05% | 0,00% | 0,00% |
| Unknown Family | 0,10% | 0,08% | 0,00% | 0,00% | 0,07% | 0,09% |
| uncultured bacterium | 0,00% | 0,00% | 0,00% | 0,00% | 0,00% | 0,00% |
| uncultured bacterium | 0,00% | 0,00% | 0,00% | 0,00% | 0,00% | 0,00% |
| Deferribacteraceae | 0,00% | 0,00% | 0,00% | 0,00% | 0,03% | 0,05% |
| Planococcaceae | 0,00% | 0,00% | 0,00% | 0,00% | 0,00% | 0,00% |
| Staphylococcaceae | 0,00% | 0,00% | 0,00% | 0,00% | 0,00% | 0,00% |
| Enterococcaceae | 0,00% | 0,00% | 0,00% | 0,00% | 0,00% | 0,00% |
| Lactobacillaceae | 1,47% | 0,65% | 0,17% | 0,12% | 2,20% | 1,93% |
| Christensenellaceae | 0,03% | 0,05% | 0,00% | 0,00% | 0,03% | 0,05% |
| Clostridiaceae 1 | 0,07% | 0,05% | 0,00% | 0,00% | 0,03% | 0,05% |
| Defluviitaleaceae | 0,00% | 0,00% | 0,10% | 0,14% | 0,00% | 0,00% |
| Eubacteriaceae | 0,00% | 0,00% | 0,00% | 0,00% | 0,00% | 0,00% |
| Family XIII | 0,07% | 0,05% | 0,13% | 0,05% | 0,10% | 0,08% |
| Lachnospiraceae | 8,50% | 4,57% | 11,23% | 14,01% | 6,80% | 1,93% |
| Peptococcaceae | 0,00% | 0,00% | 0,03% | 0,05% | 0,00% | 0,00% |
| Peptostreptococcaceae | 0,00% | 0,00% | 0,00% | 0,00% | 0,00% | 0,00% |
| Ruminococcaceae | 1,50% | 0,75% | 2,50% | 2,91% | 2,47% | 0,66% |
| vadinBB60 | 0,00% | 0,00% | 0,00% | 0,00% | 0,00% | 0,00% |
| Erysipelotrichaceae | 0,37% | 0,12% | 0,17% | 0,09% | 0,40% | 0,42% |
| Bartonellaceae | 0,03% | 0,05% | 0,00% | 0,00% | 0,00% | 0,00% |
| Brucellaceae | 0,00% | 0,00% | 0,00% | 0,00% | 0,00% | 0,00% |
| Hyphomicrobiaceae | 0,00% | 0,00% | 0,00% | 0,00% | 0,00% | 0,00% |
| Phyllobacteriaceae | 0,00% | 0,00% | 0,00% | 0,00% | 0,00% | 0,00% |
| Rhodospirillaceae | 0,00% | 0,00% | 0,00% | 0,00% | 0,00% | 0,00% |
| Rhodospirillales Incertae  Sedis | 0,00% | 0,00% | 0,00% | 0,00% | 0,00% | 0,00% |
| Alcaligenaceae | 0,03% | 0,05% | 0,00% | 0,00% | 0,07% | 0,05% |
| Desulfovibrionaceae | 0,87% | 0,33% | 0,83% | 0,91% | 0,23% | 0,12% |
| uncultured bacterium | 0,00% | 0,00% | 0,03% | 0,05% | 0,03% | 0,05% |
| Enterobacteriaceae | 0,00% | 0,00% | 15,90% | 19,93% | 3,77% | 5,26% |
| Moraxellaceae | 0,00% | 0,00% | 0,00% | 0,00% | 0,00% | 0,00% |
| uncultured bacterium | 0,00% | 0,00% | 0,00% | 0,00% | 0,00% | 0,00% |
| Verrucomicrobiaceae | 0,60% | 0,65% | 29,60% | 41,79% | 6,03% | 7,19% |

| **Genera in stool** | Control (= wild type) | | Kindlin 2(-/-) | | Kindlin 2(-/-) + UDCA-LPE | |
| --- | --- | --- | --- | --- | --- | --- |
| mean value | deviation | mean value | deviation | mean value | deviation |
| Bifidobacterium | 0,00% | 0,00% | 0,00% | 0,00% | 0,03% | 0,05% |
| Rhodococcus | 0,00% | 0,00% | 0,00% | 0,00% | 0,00% | 0,00% |
| Adlercreutzia | 0,03% | 0,05% | 0,00% | 0,00% | 0,00% | 0,00% |
| Enterorhabdus | 1,93% | 0,33% | 0,60% | 0,57% | 1,03% | 0,83% |
| Parvibacter | 0,03% | 0,05% | 0,00% | 0,00% | 0,07% | 0,09% |
| uncultured Coriobacteriaceae | 0,10% | 0,00% | 0,03% | 0,05% | 0,10% | 0,00% |
| Bacteroides | 0,10% | 0,08% | 0,70% | 0,85% | 0,77% | 0,74% |
| Odoribacter | 0,00% | 0,00% | 0,00% | 0,00% | 0,00% | 0,00% |
| Parabacteroides | 0,03% | 0,05% | 3,30% | 4,45% | 1,83% | 2,31% |
| uncultured Porphyromonadaceae | 0,00% | 0,00% | 0,37% | 0,39% | 0,37% | 0,38% |
| Alloprevotella | 1,60% | 1,14% | 2,33% | 1,97% | 10,03% | 7,43% |
| uncultured Prevotellaceae | 0,97% | 0,31% | 0,33% | 0,40% | 0,57% | 0,59% |
| Alistipes | 0,10% | 0,08% | 0,40% | 0,29% | 0,43% | 0,05% |
| RC9 gut group | 0,57% | 0,31% | 0,87% | 1,23% | 1,27% | 0,33% |
| Rikenella | 0,10% | 0,14% | 0,30% | 0,24% | 0,03% | 0,05% |
| mouse gut metagenome | 0,00% | 0,00% | 0,00% | 0,00% | 0,00% | 0,00% |
| uncultured Bacteroidales bacterium | 0,10% | 0,00% | 0,00% | 0,00% | 0,07% | 0,05% |
| uncultured bacterium S24-7 | 80,70% | 4,66% | 29,90%(* +) | 18,78% | 61,00% | 14,91% |
| unidentified S24-7 | 0,00% | 0,00% | 0,00% | 0,00% | 0,00% | 0,00% |
| uncultured bacterium VC2.1 Bac22 | 0,00% | 0,00% | 0,03% | 0,05% | 0,00% | 0,00% |
| Candidatus Saccharimonas | 0,10% | 0,08% | 0,00% | 0,00% | 0,07% | 0,09% |
| uncultured bacterium Candidate division TM7 | 0,00% | 0,00% | 0,00% | 0,00% | 0,00% | 0,00% |
| uncultured bacterium Gastranaerophilales | 0,00% | 0,00% | 0,00% | 0,00% | 0,00% | 0,00% |
| Mucispirillum | 0,00% | 0,00% | 0,00% | 0,00% | 0,03% | 0,05% |
| Planomicrobium | 0,00% | 0,00% | 0,00% | 0,00% | 0,00% | 0,00% |
| Staphylococcus | 0,00% | 0,00% | 0,00% | 0,00% | 0,00% | 0,00% |
| Enterococcus | 0,00% | 0,00% | 0,00% | 0,00% | 0,00% | 0,00% |
| Lactobacillus | 1,47% | 0,65% | 0,17% | 0,12% | 2,20% | 1,93% |
| Christensenella | 0,00% | 0,00% | 0,00% | 0,00% | 0,00% | 0,00% |
| uncultured Christensenellaceae | 0,03% | 0,05% | 0,00% | 0,00% | 0,03% | 0,05% |
| Candidatus Arthromitus | 0,07% | 0,05% | 0,00% | 0,00% | 0,03% | 0,05% |
| Clostridium sensu stricto 1 | 0,00% | 0,00% | 0,00% | 0,00% | 0,00% | 0,00% |
| Incertae Sedis Defluviitaleaceae | 0,00% | 0,00% | 0,10% | 0,14% | 0,00% | 0,00% |
| uncultured Defluviitaleaceae | 0,00% | 0,00% | 0,00% | 0,00% | 0,00% | 0,00% |
| Anaerofustis | 0,00% | 0,00% | 0,00% | 0,00% | 0,00% | 0,00% |
| Anaerovorax | 0,00% | 0,00% | 0,03% | 0,05% | 0,00% | 0,00% |
| Incertae Sedis Family XIII | 0,00% | 0,00% | 0,00% | 0,00% | 0,00% | 0,00% |
| Mogibacterium | 0,00% | 0,00% | 0,03% | 0,05% | 0,03% | 0,05% |
| uncultured Family XIII | 0,00% | 0,00% | 0,07% | 0,05% | 0,03% | 0,05% |
| Anaerostipes | 0,00% | 0,00% | 0,23% | 0,33% | 0,13% | 0,12% |
| Blautia | 5,73% | 3,90% | 4,77% | 6,25% | 2,57% | 1,32% |
| Coprococcus | 0,00% | 0,00% | 0,10% | 0,14% | 0,17% | 0,09% |
| Dorea | 0,00% | 0,00% | 0,00% | 0,00% | 0,00% | 0,00% |
| Incertae Sedis Lachnospiraceae | 0,60% | 0,08% | 1,07% | 0,82% | 1,93% | 1,38% |
| Marvinbryantia | 0,00% | 0,00% | 0,00% | 0,00% | 0,00% | 0,00% |
| Moryella | 0,20% | 0,08% | 0,07% | 0,09% | 0,03% | 0,05% |
| Pseudobutyrivibrio | 0,03% | 0,05% | 0,00% | 0,00% | 0,00% | 0,00% |
| Roseburia | 0,17% | 0,12% | 0,17% | 0,24% | 0,27% | 0,31% |
| uncultured Lachnospiraceae | 1,67% | 0,59% | 4,83% | 6,76% | 1,67% | 1,13% |
| uncultured bacterium Lachnospiraceae | 0,00% | 0,00% | 0,00% | 0,00% | 0,00% | 0,00% |
| uncultured Peptococcaceae | 0,00% | 0,00% | 0,03% | 0,05% | 0,00% | 0,00% |
| uncultured Peptostreptococcaceae | 0,00% | 0,00% | 0,00% | 0,00% | 0,00% | 0,00% |
| Anaerotruncus | 0,03% | 0,05% | 0,27% | 0,31% | 0,13% | 0,09% |
| Flavonifractor | 0,00% | 0,00% | 0,00% | 0,00% | 0,00% | 0,00% |
| Incertae Sedis Ruminococcaceae | 0,47% | 0,17% | 1,10% | 1,28% | 0,90% | 0,65% |
| Intestinimonas | 0,00% | 0,00% | 0,00% | 0,00% | 0,00% | 0,00% |
| Oscillibacter | 0,00% | 0,00% | 0,27% | 0,38% | 0,17% | 0,05% |
| Oscillospira | 0,00% | 0,00% | 0,03% | 0,05% | 0,00% | 0,00% |
| Ruminococcus | 0,00% | 0,00% | 0,03% | 0,05% | 0,03% | 0,05% |
| Subdoligranulum | 0,00% | 0,00% | 0,03% | 0,05% | 0,00% | 0,00% |
| uncultured Ruminococcaceae | 1,00% | 0,57% | 0,80% | 0,85% | 1,17% | 0,17% |
| uncultured bacterium vadinBB60 | 0,00% | 0,00% | 0,00% | 0,00% | 0,00% | 0,00% |
| Allobaculum | 0,13% | 0,12% | 0,10% | 0,08% | 0,20% | 0,28% |
| Incertae Sedis | 0,00% | 0,00% | 0,00% | 0,00% | 0,00% | 0,00% |
| uncultured | 0,20% | 0,00% | 0,00% | 0,00% | 0,13% | 0,12% |
| uncultured bacterium | 0,07% | 0,05% | 0,03% | 0,05% | 0,00% | 0,00% |
| Bartonella | 0,03% | 0,05% | 0,00% | 0,00% | 0,00% | 0,00% |
| Ochrobactrum | 0,00% | 0,00% | 0,00% | 0,00% | 0,00% | 0,00% |
| uncultured | 0,00% | 0,00% | 0,00% | 0,00% | 0,00% | 0,00% |
| Mesorhizobium | 0,00% | 0,00% | 0,00% | 0,00% | 0,00% | 0,00% |
| Phyllobacterium | 0,00% | 0,00% | 0,00% | 0,00% | 0,00% | 0,00% |
| Thalassospira | 0,00% | 0,00% | 0,00% | 0,00% | 0,00% | 0,00% |
| Reyranella | 0,00% | 0,00% | 0,00% | 0,00% | 0,00% | 0,00% |
| Parasutterella | 0,03% | 0,05% | 0,00% | 0,00% | 0,07% | 0,05% |
| Bilophila | 0,00% | 0,00% | 0,00% | 0,00% | 0,00% | 0,00% |
| Desulfovibrio | 0,83% | 0,29% | 0,80% | 0,86% | 0,23% | 0,12% |
| uncultured bacterium B38 | 0,00% | 0,00% | 0,03% | 0,05% | 0,03% | 0,05% |
| Cedecea | 0,00% | 0,00% | 0,00% | 0,00% | 0,00% | 0,00% |
| Citrobacter | 0,00% | 0,00% | 0,00% | 0,00% | 0,00% | 0,00% |
| Enterobacter | 0,00% | 0,00% | 1,30% | 1,77% | 0,30% | 0,42% |
| Erwinia | 0,00% | 0,00% | 0,00% | 0,00% | 0,00% | 0,00% |
| Escherichia-Shigella | 0,00% | 0,00% | 14,60% | 18,16% | 3,50% | 4,88% |
| Klebsiella | 0,00% | 0,00% | 0,00% | 0,00% | 0,00% | 0,00% |
| Pantoea | 0,00% | 0,00% | 0,03% | 0,05% | 0,00% | 0,00% |
| Providencia | 0,00% | 0,00% | 0,00% | 0,00% | 0,00% | 0,00% |
| Raoultella | 0,00% | 0,00% | 0,00% | 0,00% | 0,00% | 0,00% |
| Tatumella | 0,00% | 0,00% | 0,00% | 0,00% | 0,00% | 0,00% |
| Acinetobacter | 0,00% | 0,00% | 0,00% | 0,00% | 0,00% | 0,00% |
| uncultured bacterium RF9 | 0,00% | 0,00% | 0,00% | 0,00% | 0,00% | 0,00% |
| Akkermansia | 0,60% | 0,65% | 29,60% | 41,79% | 6,03% | 7,19% |

| **Species in stool** | Control (= wild-type) | | Kindlin 2(-/-) | | Kindlin 2(-/-) + UDCA-LPE | |
| --- | --- | --- | --- | --- | --- | --- |
| mean value | deviation | mean value | deviation | mean value | deviation |
| Bifidobacterium choerinum | 0,00% | 0,00% | 0,00% | 0,00% | 0,03% | 0,05% |
| Bifidobacterium pseudolongum subsp.  globosum | 0,00% | 0,00% | 0,00% | 0,00% | 0,00% | 0,00% |
| uncultured bacterium Rhodococcus | 0,00% | 0,00% | 0,00% | 0,00% | 0,00% | 0,00% |
| unidentified Rhodococcus | 0,00% | 0,00% | 0,00% | 0,00% | 0,00% | 0,00% |
| unidentified Adlercreutzia | 0,03% | 0,05% | 0,00% | 0,00% | 0,00% | 0,00% |
| mouse gut metagenome Enterorhabdus | 0,13% | 0,05% | 0,03% | 0,05% | 0,07% | 0,09% |
| uncultured bacterium Enterorhabdus | 1,80% | 0,29% | 0,53% | 0,54% | 0,97% | 0,74% |
| Parvibacter caecicola | 0,03% | 0,05% | 0,00% | 0,00% | 0,07% | 0,09% |
| uncultured Coriobacteriales bacterium | 0,03% | 0,05% | 0,00% | 0,00% | 0,00% | 0,00% |
| uncultured bacterium Coriobacteriaceae | 0,10% | 0,00% | 0,03% | 0,05% | 0,10% | 0,00% |
| Bacteroides acidifaciens | 0,03% | 0,05% | 0,07% | 0,09% | 0,03% | 0,05% |
| bacterium NLAE-zl-G71 | 0,00% | 0,00% | 0,00% | 0,00% | 0,00% | 0,00% |
| uncultured bacterium Bacteroides | 0,07% | 0,09% | 0,63% | 0,75% | 0,70% | 0,65% |
| uncultured organism Bacteroides | 0,00% | 0,00% | 0,00% | 0,00% | 0,00% | 0,00% |
| uncultured bacterium Odoribacter | 0,00% | 0,00% | 0,00% | 0,00% | 0,00% | 0,00% |
| uncultured organism Odoribacter | 0,00% | 0,00% | 0,00% | 0,00% | 0,00% | 0,00% |
| unidentified Odoribacter | 0,00% | 0,00% | 0,00% | 0,00% | 0,00% | 0,00% |
| Parabacteroides distasonis | 0,00% | 0,00% | 0,23% | 0,33% | 0,10% | 0,14% |
| bacterium NLAE-zl-P241 | 0,00% | 0,00% | 0,13% | 0,19% | 0,03% | 0,05% |
| uncultured bacterium Parabacteroides | 0,00% | 0,00% | 1,60% | 2,19% | 0,80% | 0,99% |
| uncultured organism Parabacteroides | 0,03% | 0,05% | 1,33% | 1,74% | 0,90% | 1,13% |
| uncultured bacterium Porphyromonadaceae | 0,00% | 0,00% | 0,37% | 0,39% | 0,37% | 0,38% |
| uncultured bacterium Alloprevotella | 1,60% | 1,14% | 2,33% | 1,97% | 10,03% | 7,43% |
| uncultured bacterium Prevotellaceae | 0,97% | 0,31% | 0,33% | 0,40% | 0,57% | 0,59% |
| human gut metagenome Alistipes | 0,00% | 0,00% | 0,03% | 0,05% | 0,00% | 0,00% |
| uncultured bacterium Alistipes | 0,10% | 0,08% | 0,40% | 0,29% | 0,37% | 0,05% |
| uncultured organism Alistipes | 0,00% | 0,00% | 0,00% | 0,00% | 0,00% | 0,00% |
| uncultured bacterium RC9 gut group | 0,57% | 0,31% | 0,87% | 1,23% | 1,27% | 0,33% |
| uncultured bacterium Rikenella | 0,10% | 0,14% | 0,30% | 0,24% | 0,03% | 0,05% |
| mouse gut metagenome S24-7 | 0,00% | 0,00% | 0,00% | 0,00% | 0,00% | 0,00% |
| uncultured Bacteroidales bacterium | 0,10% | 0,00% | 0,00% | 0,00% | 0,07% | 0,05% |
| uncultured bacterium S24-7 | 80,70% | 4,66% | 29,90% (*) | 18,78% | 61,00% | 14,91% |
| unidentified S24-7 | 0,00% | 0,00% | 0,00% | 0,00% | 0,00% | 0,00% |
| uncultured bacterium VC2.1 Bac22 | 0,00% | 0,00% | 0,03% | 0,05% | 0,00% | 0,00% |
| uncultured bacterium Candidatus  Saccharimonas | 0,10% | 0,08% | 0,00% | 0,00% | 0,07% | 0,09% |
| uncultured bacterium Candidate division TM7 | 0,00% | 0,00% | 0,00% | 0,00% | 0,00% | 0,00% |
| uncultured bacterium Gastranaerophilales | 0,00% | 0,00% | 0,00% | 0,00% | 0,00% | 0,00% |
| uncultured bacterium Mucispirillum | 0,00% | 0,00% | 0,00% | 0,00% | 0,03% | 0,05% |
| uncultured bacterium Planomicrobium | 0,00% | 0,00% | 0,00% | 0,00% | 0,00% | 0,00% |
| Staphylococcus sp. icri14 | 0,00% | 0,00% | 0,00% | 0,00% | 0,00% | 0,00% |
| Enterococcus durans | 0,00% | 0,00% | 0,00% | 0,00% | 0,00% | 0,00% |
| Enterococcus faecalis | 0,00% | 0,00% | 0,00% | 0,00% | 0,00% | 0,00% |
| Enterococcus sp. CGLBL225 | 0,00% | 0,00% | 0,00% | 0,00% | 0,00% | 0,00% |
| Enterococcus sp. L2(2012) | 0,00% | 0,00% | 0,00% | 0,00% | 0,00% | 0,00% |
| bacterium NLAE-zl-H395 | 0,00% | 0,00% | 0,00% | 0,00% | 0,00% | 0,00% |
| uncultured Enterococcus sp. | 0,00% | 0,00% | 0,00% | 0,00% | 0,00% | 0,00% |
| uncultured bacterium Enterococcus | 0,00% | 0,00% | 0,00% | 0,00% | 0,00% | 0,00% |
| uncultured organism Enterococcus | 0,00% | 0,00% | 0,00% | 0,00% | 0,00% | 0,00% |
| Lactobacillus oris F0423 | 0,00% | 0,00% | 0,00% | 0,00% | 0,03% | 0,05% |
| Lactobacillus reuteri | 0,30% | 0,22% | 0,00% | 0,00% | 0,33% | 0,34% |
| Lactobacillus reuteri ATCC 53608 | 0,00% | 0,00% | 0,00% | 0,00% | 0,03% | 0,05% |
| uncultured Lactobacillaceae bacterium | 0,23% | 0,12% | 0,00% | 0,00% | 0,40% | 0,37% |
| uncultured Lactobacillus sp. | 0,00% | 0,00% | 0,00% | 0,00% | 0,00% | 0,00% |
| uncultured bacterium Lactobacillus | 0,87% | 0,33% | 0,13% | 0,12% | 1,40% | 1,19% |
| uncultured bacterium Christensenella | 0,00% | 0,00% | 0,00% | 0,00% | 0,00% | 0,00% |
| uncultured bacterium Christensenellaceae | 0,00% | 0,00% | 0,00% | 0,00% | 0,00% | 0,00% |
| unidentified Christensenellaceae | 0,03% | 0,05% | 0,00% | 0,00% | 0,03% | 0,05% |
| Candidatus Arthromitus sp. SFB-mouse-Japan | 0,00% | 0,00% | 0,00% | 0,00% | 0,00% | 0,00% |
| uncultured bacterium Candidatus Arthromitus | 0,07% | 0,05% | 0,00% | 0,00% | 0,03% | 0,05% |
| uncultured bacterium Clostridium sensu  stricto 1 | 0,00% | 0,00% | 0,00% | 0,00% | 0,00% | 0,00% |
| uncultured bacterium Incertae Sedis Defluviitaleaceae | 0,00% | 0,00% | 0,07% | 0,09% | 0,00% | 0,00% |
| uncultured organism Incertae Sedis Defluviitaleaceae | 0,00% | 0,00% | 0,03% | 0,05% | 0,00% | 0,00% |
| uncultured bacterium Defluviitaleaceae | 0,00% | 0,00% | 0,00% | 0,00% | 0,00% | 0,00% |
| uncultured bacterium Anaerofustis | 0,00% | 0,00% | 0,00% | 0,00% | 0,00% | 0,00% |
| uncultured bacterium Anaerovorax | 0,00% | 0,00% | 0,03% | 0,05% | 0,00% | 0,00% |
| uncultured bacterium Incertae Sedis Family XIII | 0,00% | 0,00% | 0,00% | 0,00% | 0,00% | 0,00% |
| unidentified Incertae Sedis Family XIII | 0,00% | 0,00% | 0,00% | 0,00% | 0,00% | 0,00% |
| uncultured bacterium Mogibacterium | 0,00% | 0,00% | 0,03% | 0,05% | 0,03% | 0,05% |
| uncultured bacterium Family XIII | 0,00% | 0,00% | 0,03% | 0,05% | 0,03% | 0,05% |
| uncultured organism Family XIII | 0,00% | 0,00% | 0,00% | 0,00% | 0,00% | 0,00% |
| unidentified Family XIII | 0,00% | 0,00% | 0,00% | 0,00% | 0,00% | 0,00% |
| uncultured bacterium Anaerostipes | 0,00% | 0,00% | 0,23% | 0,33% | 0,13% | 0,12% |
| Lachnospiraceae bacterium 615 | 0,00% | 0,00% | 0,00% | 0,00% | 0,00% | 0,00% |
| uncultured Clostridiales bacterium Blautia | 0,00% | 0,00% | 0,00% | 0,00% | 0,00% | 0,00% |
| uncultured bacterium Blautia | 4,60% | 3,06% | 4,23% | 5,50% | 2,33% | 1,31% |
| uncultured organism Blautia | 0,00% | 0,00% | 0,00% | 0,00% | 0,03% | 0,05% |
| unidentified Blautia | 1,10% | 0,86% | 0,53% | 0,75% | 0,17% | 0,05% |
| uncultured bacterium Coprococcus | 0,00% | 0,00% | 0,10% | 0,14% | 0,13% | 0,05% |
| unidentified Coprococcus | 0,00% | 0,00% | 0,00% | 0,00% | 0,03% | 0,05% |
| uncultured bacterium Dorea | 0,00% | 0,00% | 0,00% | 0,00% | 0,00% | 0,00% |
| bacterium enrichment culture clone Ecwsrb007 | 0,00% | 0,00% | 0,23% | 0,26% | 0,10% | 0,14% |
| uncultured Firmicutes bacterium Incertae Sedis Lachnospiraceae | 0,00% | 0,00% | 0,00% | 0,00% | 0,00% | 0,00% |
| uncultured bacterium Incertae Sedis Lachnospiraceae | 0,57% | 0,05% | 0,80% | 0,57% | 1,80% | 1,26% |
| uncultured organism Incertae Sedis Lachnospiraceae | 0,00% | 0,00% | 0,00% | 0,00% | 0,00% | 0,00% |
| unidentified Incertae Sedis Lachnospiraceae | 0,00% | 0,00% | 0,00% | 0,00% | 0,00% | 0,00% |
| uncultured bacterium Marvinbryantia | 0,00% | 0,00% | 0,00% | 0,00% | 0,00% | 0,00% |
| uncultured rumen bacterium Marvinbryantia | 0,00% | 0,00% | 0,00% | 0,00% | 0,00% | 0,00% |
| uncultured bacterium Moryella | 0,20% | 0,08% | 0,07% | 0,09% | 0,03% | 0,05% |
| uncultured bacterium Pseudobutyrivibrio | 0,03% | 0,05% | 0,00% | 0,00% | 0,00% | 0,00% |
| uncultured organism Pseudobutyrivibrio | 0,03% | 0,05% | 0,00% | 0,00% | 0,00% | 0,00% |
| uncultured Clostridiales bacterium Roseburia | 0,00% | 0,00% | 0,00% | 0,00% | 0,00% | 0,00% |
| uncultured bacterium Roseburia | 0,17% | 0,12% | 0,17% | 0,24% | 0,23% | 0,33% |
| uncultured organism Roseburia | 0,00% | 0,00% | 0,00% | 0,00% | 0,00% | 0,00% |
| uncultured Clostridiales bacterium Lachnospiraceae | 0,00% | 0,00% | 0,00% | 0,00% | 0,00% | 0,00% |
| uncultured bacterium Lachnospiraceae | 1,53% | 0,47% | 4,60% | 6,43% | 1,57% | 1,05% |
| uncultured organism Lachnospiraceae | 0,20% | 0,14% | 0,10% | 0,14% | 0,03% | 0,05% |
| unidentified Lachnospiraceae | 0,03% | 0,05% | 0,17% | 0,24% | 0,07% | 0,05% |
| uncultured bacterium Lachnospiraceae | 0,00% | 0,00% | 0,00% | 0,00% | 0,00% | 0,00% |
| unidentified Peptococcaceae | 0,00% | 0,00% | 0,03% | 0,05% | 0,00% | 0,00% |
| uncultured bacterium Peptostreptococcaceae | 0,00% | 0,00% | 0,00% | 0,00% | 0,00% | 0,00% |
| uncultured bacterium Anaerotruncus | 0,03% | 0,05% | 0,27% | 0,31% | 0,13% | 0,09% |
| uncultured organism Anaerotruncus | 0,00% | 0,00% | 0,00% | 0,00% | 0,00% | 0,00% |
| uncultured bacterium Flavonifractor | 0,00% | 0,00% | 0,00% | 0,00% | 0,00% | 0,00% |
| Clostridium viride | 0,00% | 0,00% | 0,00% | 0,00% | 0,00% | 0,00% |
| uncultured Clostridiales bacterium Incertae  Sedis Ruminococcaceae | 0,00% | 0,00% | 0,00% | 0,00% | 0,00% | 0,00% |
| uncultured bacterium Incertae Sedis Ruminococcaceae | 0,43% | 0,12% | 1,10% | 1,28% | 0,87% | 0,60% |
| unidentified Incertae Sedis Ruminococcaceae | 0,00% | 0,00% | 0,00% | 0,00% | 0,03% | 0,05% |
| uncultured bacterium Intestinimonas | 0,00% | 0,00% | 0,00% | 0,00% | 0,00% | 0,00% |
| uncultured bacterium Oscillibacter | 0,00% | 0,00% | 0,27% | 0,38% | 0,17% | 0,05% |
| unidentified Oscillibacter | 0,00% | 0,00% | 0,00% | 0,00% | 0,00% | 0,00% |
| uncultured bacterium Oscillospira | 0,00% | 0,00% | 0,00% | 0,00% | 0,00% | 0,00% |
| uncultured rumen bacterium Oscillospira | 0,00% | 0,00% | 0,00% | 0,00% | 0,00% | 0,00% |
| uncultured bacterium Ruminococcus | 0,00% | 0,00% | 0,03% | 0,05% | 0,03% | 0,05% |
| uncultured bacterium Subdoligranulum | 0,00% | 0,00% | 0,00% | 0,00% | 0,00% | 0,00% |
| uncultured organism Subdoligranulum | 0,00% | 0,00% | 0,03% | 0,05% | 0,00% | 0,00% |
| human gut metagenome Ruminococcaceae | 0,00% | 0,00% | 0,00% | 0,00% | 0,00% | 0,00% |
| uncultured bacterium Ruminococcaceae | 0,93% | 0,52% | 0,77% | 0,81% | 1,13% | 0,12% |
| uncultured organism Ruminococcaceae | 0,00% | 0,00% | 0,00% | 0,00% | 0,00% | 0,00% |
| uncultured rumen bacterium Ruminococcaceae | 0,07% | 0,05% | 0,00% | 0,00% | 0,00% | 0,00% |
| unidentified Ruminococcaceae | 0,03% | 0,05% | 0,00% | 0,00% | 0,00% | 0,00% |
| uncultured bacterium vadinBB60 | 0,00% | 0,00% | 0,00% | 0,00% | 0,00% | 0,00% |
| uncultured bacterium Allobaculum | 0,13% | 0,12% | 0,10% | 0,08% | 0,20% | 0,28% |
| uncultured bacterium Incertae Sedis Erysipelotrichaceae | 0,00% | 0,00% | 0,00% | 0,00% | 0,00% | 0,00% |
| unidentified Incertae Sedis Erysipelotrichaceae | 0,00% | 0,00% | 0,00% | 0,00% | 0,00% | 0,00% |
| uncultured bacterium Erysipelotrichaceae | 0,00% | 0,00% | 0,00% | 0,00% | 0,03% | 0,05% |
| unidentified Erysipelotrichaceae | 0,20% | 0,00% | 0,00% | 0,00% | 0,10% | 0,08% |
| uncultured bacterium Erysipelotrichaceae | 0,07% | 0,05% | 0,03% | 0,05% | 0,00% | 0,00% |
| uncultured Bartonella sp. | 0,03% | 0,05% | 0,00% | 0,00% | 0,00% | 0,00% |
| uncultured bacterium Ochrobactrum | 0,00% | 0,00% | 0,00% | 0,00% | 0,00% | 0,00% |
| uncultured bacterium Hyphomicrobiaceae | 0,00% | 0,00% | 0,00% | 0,00% | 0,00% | 0,00% |
| uncultured Sinorhizobium sp. | 0,00% | 0,00% | 0,00% | 0,00% | 0,00% | 0,00% |
| uncultured Enterobacteriaceae bacterium Phyllobacterium | 0,00% | 0,00% | 0,00% | 0,00% | 0,00% | 0,00% |
| uncultured bacterium Phyllobacterium | 0,00% | 0,00% | 0,00% | 0,00% | 0,00% | 0,00% |
| uncultured organism Thalassospira | 0,00% | 0,00% | 0,00% | 0,00% | 0,00% | 0,00% |
| uncultured bacterium Reyranella | 0,00% | 0,00% | 0,00% | 0,00% | 0,00% | 0,00% |
| uncultured bacterium Parasutterella | 0,03% | 0,05% | 0,00% | 0,00% | 0,07% | 0,05% |
| uncultured bacterium Bilophila | 0,00% | 0,00% | 0,00% | 0,00% | 0,00% | 0,00% |
| Desulfovibrio sp. 3_1_syn3 | 0,00% | 0,00% | 0,00% | 0,00% | 0,00% | 0,00% |
| Desulfovibrio sp. wp6 | 0,00% | 0,00% | 0,00% | 0,00% | 0,00% | 0,00% |
| uncultured bacterium Desulfovibrio | 0,83% | 0,29% | 0,70% | 0,85% | 0,23% | 0,12% |
| unidentified Desulfovibrio | 0,00% | 0,00% | 0,10% | 0,08% | 0,00% | 0,00% |
| uncultured bacterium B38 | 0,00% | 0,00% | 0,03% | 0,05% | 0,03% | 0,05% |
| uncultured Enterobacteriaceae bacterium Cedecea | 0,00% | 0,00% | 0,00% | 0,00% | 0,00% | 0,00% |
| Enterobacter hormaechei | 0,00% | 0,00% | 0,00% | 0,00% | 0,00% | 0,00% |
| Enterobacter aerogenes | 0,00% | 0,00% | 0,00% | 0,00% | 0,00% | 0,00% |
| Enterobacter cloacae | 0,00% | 0,00% | 0,00% | 0,00% | 0,00% | 0,00% |
| Enterobacter sp. 3242 | 0,00% | 0,00% | 0,00% | 0,00% | 0,00% | 0,00% |
| Enterobacter sp. J33a | 0,00% | 0,00% | 0,00% | 0,00% | 0,00% | 0,00% |
| Enterobacter sp. R4-368 | 0,00% | 0,00% | 0,00% | 0,00% | 0,00% | 0,00% |
| Enterobacter sp. TSE25 | 0,00% | 0,00% | 0,00% | 0,00% | 0,00% | 0,00% |
| Enterobacter sp. icri1 | 0,00% | 0,00% | 0,00% | 0,00% | 0,00% | 0,00% |
| Klebsiella sp. A1 | 0,00% | 0,00% | 0,00% | 0,00% | 0,00% | 0,00% |
| Pantoea agglomerans | 0,00% | 0,00% | 0,00% | 0,00% | 0,00% | 0,00% |
| endophytic bacterium S04 | 0,00% | 0,00% | 0,00% | 0,00% | 0,00% | 0,00% |
| uncultured Enterobacteriaceae bacterium Enterobacter | 0,00% | 0,00% | 0,00% | 0,00% | 0,00% | 0,00% |
| uncultured bacterium Enterobacter | 0,00% | 0,00% | 1,30% | 1,77% | 0,30% | 0,42% |
| uncultured organism Enterobacter | 0,00% | 0,00% | 0,00% | 0,00% | 0,00% | 0,00% |
| Erwinia mallotivora | 0,00% | 0,00% | 0,00% | 0,00% | 0,00% | 0,00% |
| Escherichia coli | 0,00% | 0,00% | 13,27% | 16,42% | 3,23% | 4,50% |
| Escherichia coli TOP293-3 | 0,00% | 0,00% | 0,00% | 0,00% | 0,00% | 0,00% |
| Escherichia sp. 21CR | 0,00% | 0,00% | 0,00% | 0,00% | 0,00% | 0,00% |
| Escherichia sp. enrichment culture  clone 19(2012) | 0,00% | 0,00% | 0,00% | 0,00% | 0,00% | 0,00% |
| Paracoccus sp. B-1012 | 0,00% | 0,00% | 0,00% | 0,00% | 0,00% | 0,00% |
| Shigella flexneri | 0,00% | 0,00% | 1,03% | 1,32% | 0,20% | 0,28% |
| Shigella sp. JN-4 | 0,00% | 0,00% | 0,00% | 0,00% | 0,00% | 0,00% |
| bacterium NLAE-zl-G495 | 0,00% | 0,00% | 0,00% | 0,00% | 0,00% | 0,00% |
| bacterium NLAE-zl-G505 | 0,00% | 0,00% | 0,00% | 0,00% | 0,00% | 0,00% |
| uncultured Enterobacteriaceae bacterium | 0,00% | 0,00% | 0,03% | 0,05% | 0,03% | 0,05% |
| uncultured Escherichia sp. | 0,00% | 0,00% | 0,00% | 0,00% | 0,00% | 0,00% |
| uncultured Parabacteroides sp. | 0,00% | 0,00% | 0,00% | 0,00% | 0,00% | 0,00% |
| uncultured bacterium Escherichia-Shigella | 0,00% | 0,00% | 0,20% | 0,28% | 0,03% | 0,05% |
| uncultured compost bacterium Escherichia-Shigella | 0,00% | 0,00% | 0,00% | 0,00% | 0,00% | 0,00% |
| uncultured gamma proteobacterium Escherichia-Shigella | 0,00% | 0,00% | 0,00% | 0,00% | 0,00% | 0,00% |
| uncultured organism Escherichia-Shigella | 0,00% | 0,00% | 0,03% | 0,05% | 0,00% | 0,00% |
| Klebsiella pneumoniae | 0,00% | 0,00% | 0,00% | 0,00% | 0,00% | 0,00% |
| Klebsiella sp. Rai5 | 0,00% | 0,00% | 0,00% | 0,00% | 0,00% | 0,00% |
| uncultured Klebsiella sp. | 0,00% | 0,00% | 0,00% | 0,00% | 0,00% | 0,00% |
| uncultured bacterium Klebsiella | 0,00% | 0,00% | 0,00% | 0,00% | 0,00% | 0,00% |
| uncultured organism Klebsiella | 0,00% | 0,00% | 0,00% | 0,00% | 0,00% | 0,00% |
| Enterobacter sp. Bdr5 | 0,00% | 0,00% | 0,00% | 0,00% | 0,00% | 0,00% |
| Enterobacter sp. JN0513 | 0,00% | 0,00% | 0,00% | 0,00% | 0,00% | 0,00% |
| Enterobacter sp. icri11 | 0,00% | 0,00% | 0,00% | 0,00% | 0,00% | 0,00% |
| Klebsiella oxytoca | 0,00% | 0,00% | 0,00% | 0,00% | 0,00% | 0,00% |
| Pantoea agglomerans | 0,00% | 0,00% | 0,03% | 0,05% | 0,00% | 0,00% |
| Pantoea ananatis | 0,00% | 0,00% | 0,00% | 0,00% | 0,00% | 0,00% |
| Pantoea septica | 0,00% | 0,00% | 0,00% | 0,00% | 0,00% | 0,00% |
| uncultured bacterium Providencia | 0,00% | 0,00% | 0,00% | 0,00% | 0,00% | 0,00% |
| bacterium enrichment culture clone MW-11 | 0,00% | 0,00% | 0,00% | 0,00% | 0,00% | 0,00% |
| Klebsiella sp. EC1.1 | 0,00% | 0,00% | 0,00% | 0,00% | 0,00% | 0,00% |
| uncultured bacterium Tatumella | 0,00% | 0,00% | 0,00% | 0,00% | 0,00% | 0,00% |
| uncultured bacterium Acinetobacter | 0,00% | 0,00% | 0,00% | 0,00% | 0,00% | 0,00% |
| uncultured bacterium RF9 | 0,00% | 0,00% | 0,00% | 0,00% | 0,00% | 0,00% |
| uncultured bacterium Akkermansia | 0,60% | 0,65% | 29,60% | 41,79% | 6,03% | 7,19% |
| uncultured organism Akkermansia | 0,00% | 0,00% | 0,00% | 0,00% | 0,00% | 0,00% |
